# Supplementary material
Source: PubMed Central journal article supplement (PMC3704223)

**Family 1**

■ Diagnosis = CRC

◻ Follow Up Sequencing = 1

◻ Polyp = 1

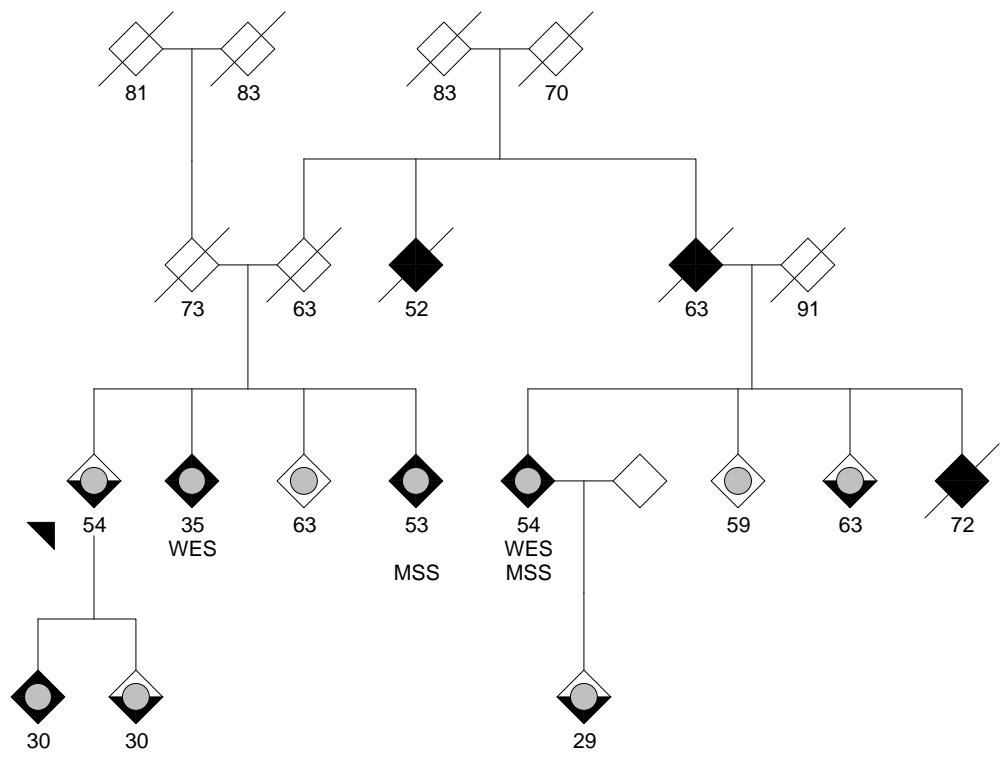

Family 2

■ Diagnosis = CRC    ◯ Follow Up Sequencing = 1    ◻ Polyp = 1

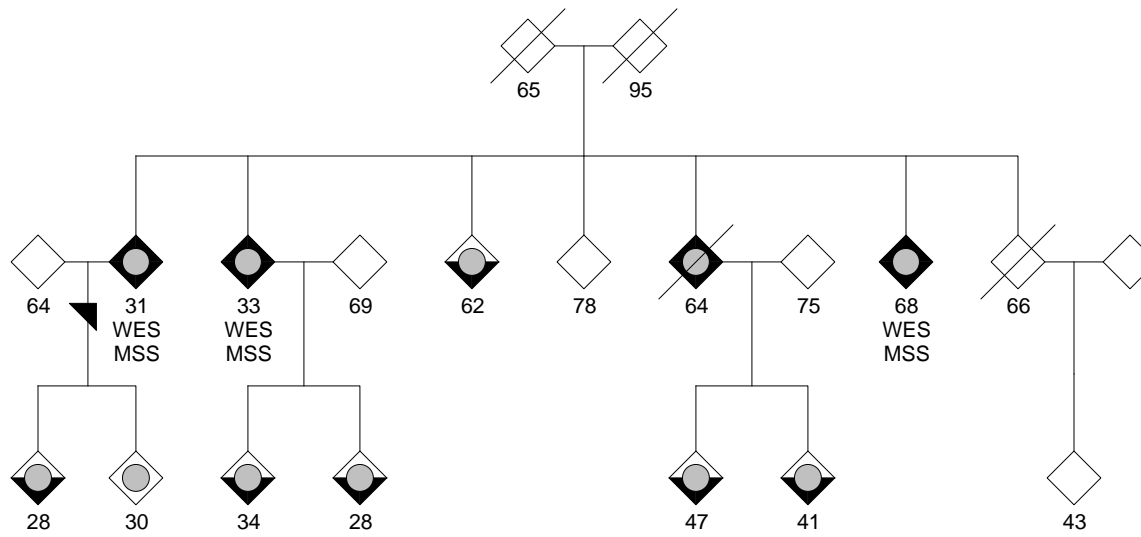

**Family 3**

■ Diagnosis = CRC    □ Follow Up Sequencing = 1

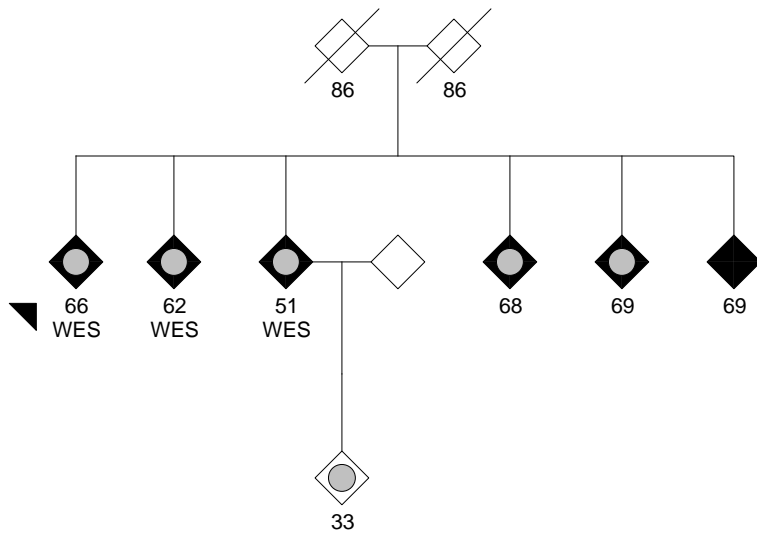

Family 4

■ Diagnosis = CRC

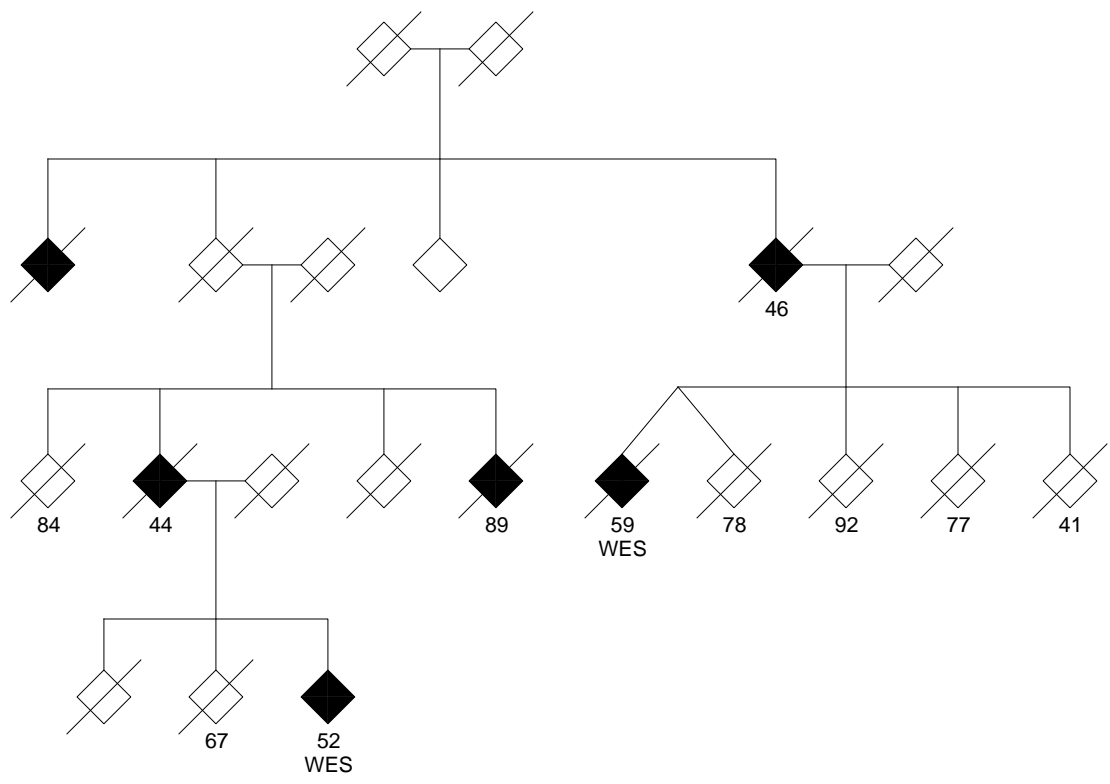

**Family 5**

■ Diagnosis = CRC

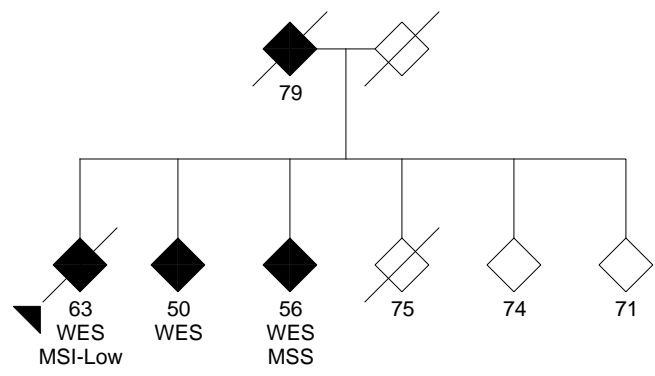

**Family 6**

■ Diagnosis = CRC

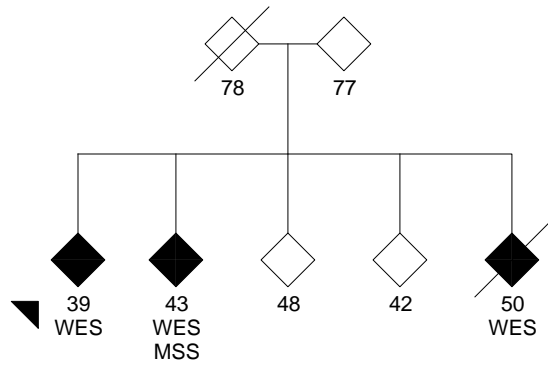

Family 7

■ Diagnosis = CRC

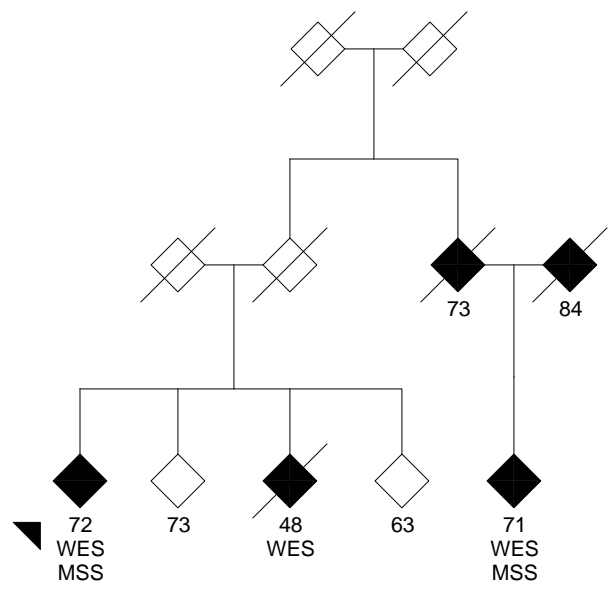

Family 8

Diagnosis = CRC    Follow Up Sequencing = 1

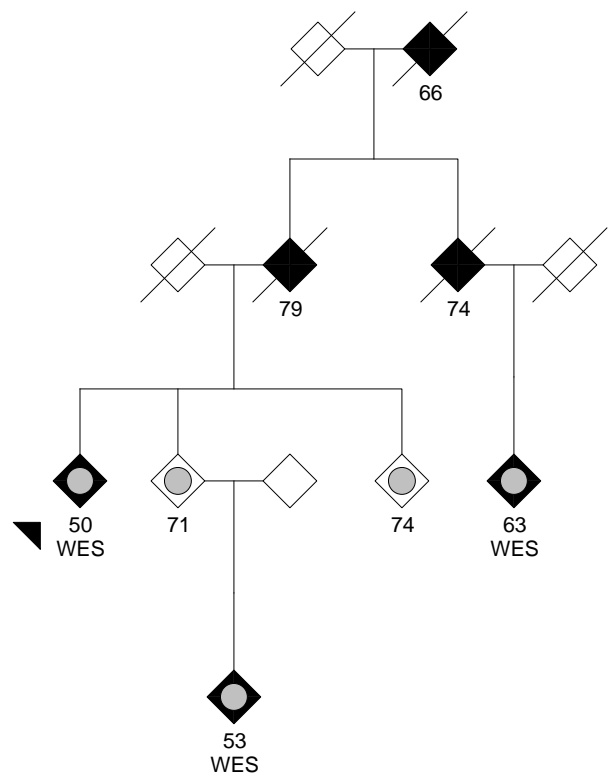



**Family 9**

■ Diagnosis = CRC    □ ● Follow Up Sequencing = 1

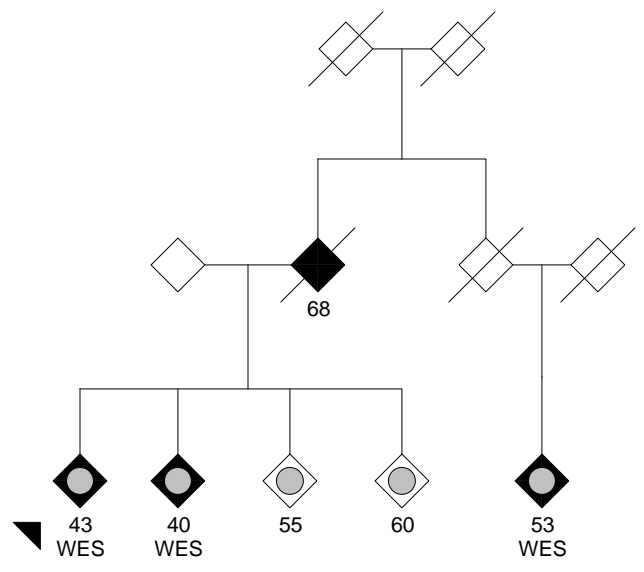

**Family 10**

■ Diagnosis = CRC

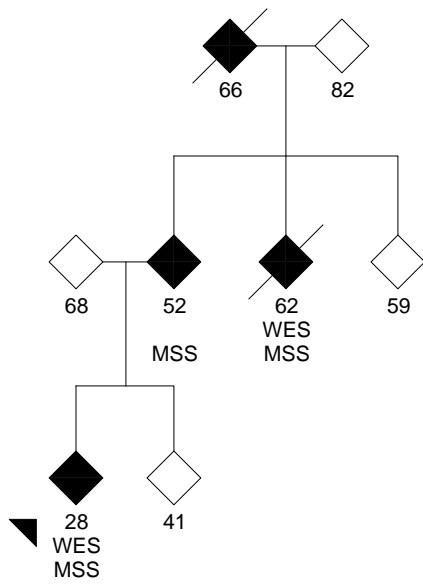

*Family 11*

■ Diagnosis = CRC

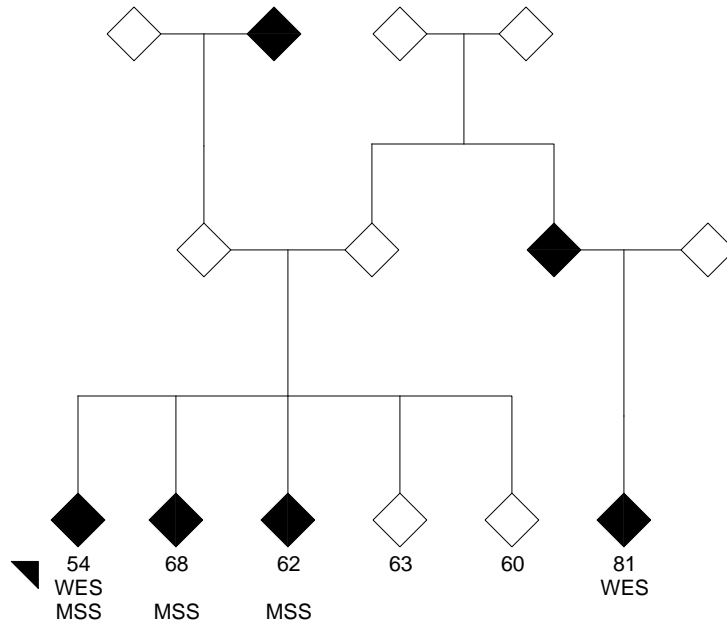

**Family 12**

■ Diagnosis = CRC    □ ● Follow Up Sequencing = 1    ■ Polyp = 1

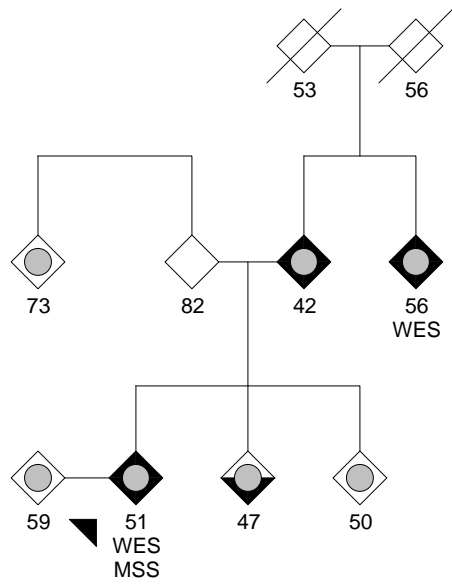

Family 13

■ Diagnosis = CRC

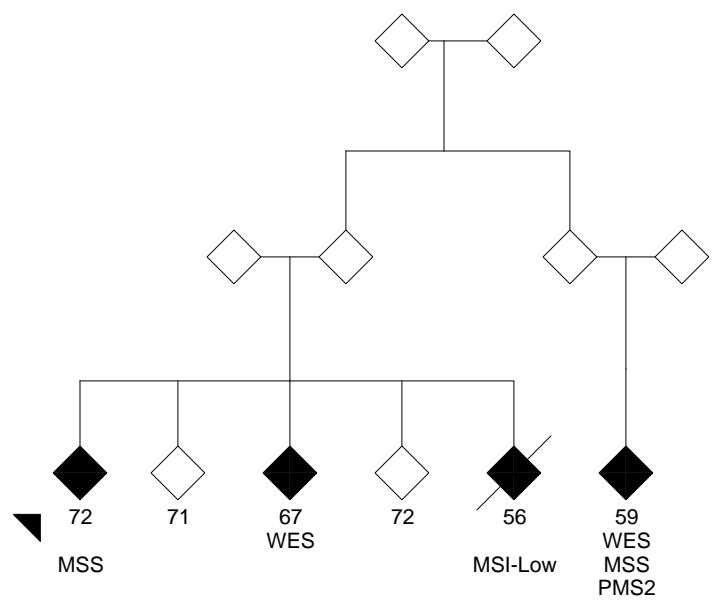

**Family 14**

■ Diagnosis = CRC

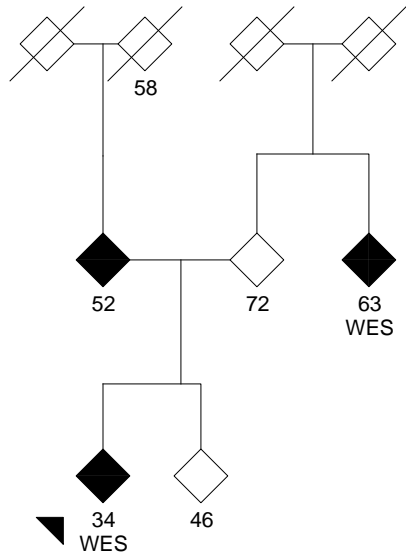

Family 15

■ Diagnosis = CRC

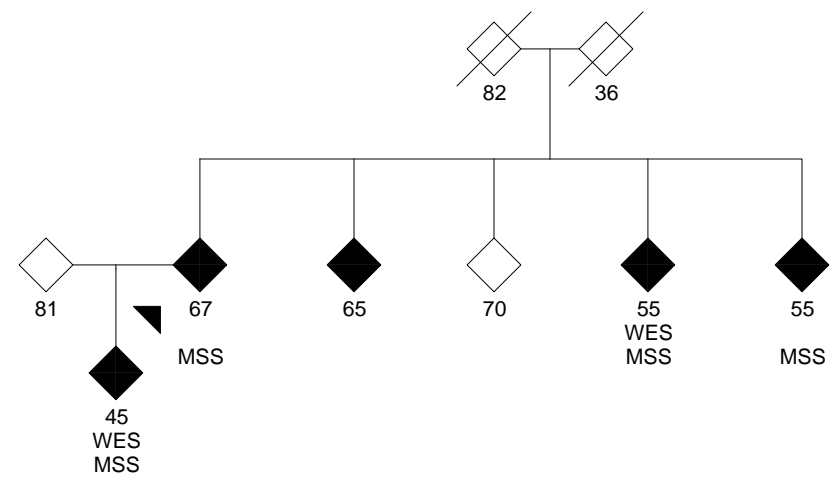

**Family16**

■ Diagnosis = CRC

○ Follow Up Sequencing = 1

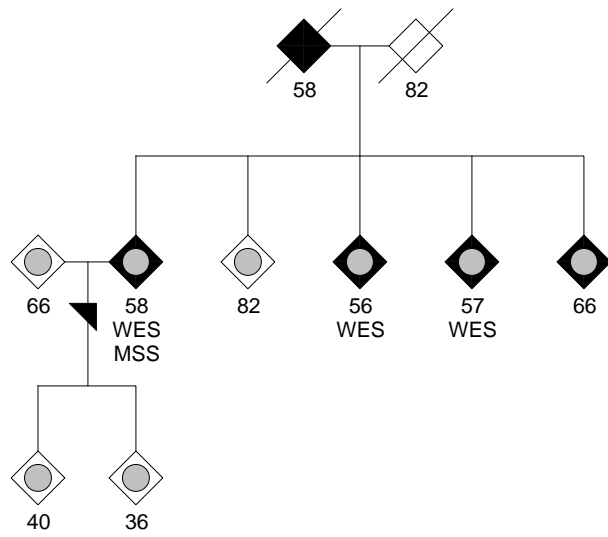

Supplement: NIHMS474408-supplement-1.pdf [file NIHMS474408-supplement-1.pdf]
