# Supplementary material
Source: PubMed Central journal article supplement (PMC3704223)

2a

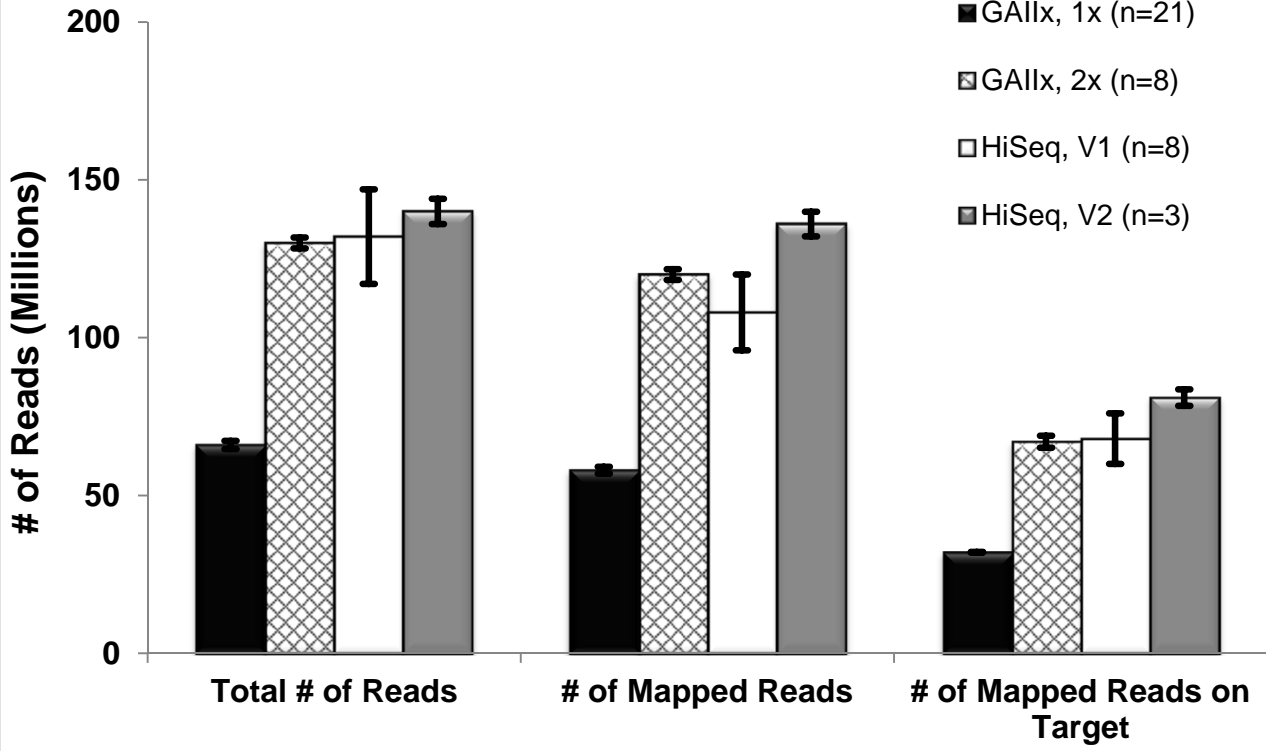

2b

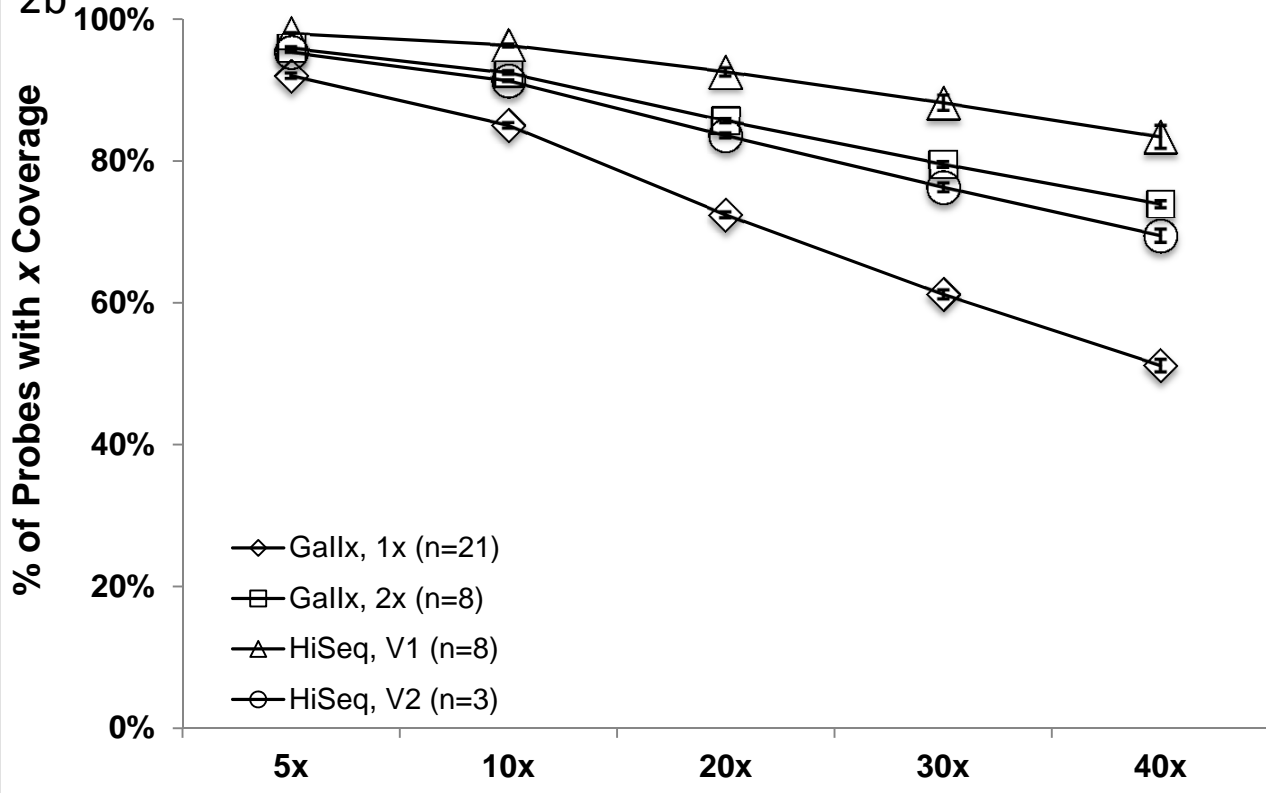

Supplement: NIHMS474408-supplement-2.pdf [file NIHMS474408-supplement-2.pdf]
